# Supplementary material
Source: ML conference proceedings conference paper supplement (https://openaccess.thecvf.com/content/CVPR_2019/html/Collomosse_LiveSketch_Query_Perturbations_CVPR_2019_paper.html)
Supplement: Supplementary file 1 [file Collomosse_LiveSketch_Query_Perturbations_CVPR_2019_supplemental.pdf]

Archive with 1 entries (1 files):
- livesketch_showreel_final_1.mp4
